# Supplementary material
Source: PubMed Central journal article supplement (PMC2519714)

**Supplementary Information Table S1: Top Ranking Fragments in PPR5 RIP-chip assays**

| Fragment Name               | Fragment number <sup>a</sup> | PPR5 IP                                        |                       | OEC IP                                         |                       | Comparison: log <sub>2</sub> PPR5 ratio-log <sub>2</sub> OEC ratio |                 |
|-----------------------------|------------------------------|------------------------------------------------|-----------------------|------------------------------------------------|-----------------------|--------------------------------------------------------------------|-----------------|
|                             |                              | Median Log <sub>2</sub> Ratio (E) <sup>b</sup> | <i>n</i> <sup>b</sup> | Median Log <sub>2</sub> Ratio (E) <sup>b</sup> | <i>n</i> <sup>b</sup> | Relative Enrichment (E <sub>PPR5</sub> - E <sub>OEC</sub> )        | P <sup>c</sup>  |
| <b>trnG-UCCex/int</b>       | <b>25</b>                    | <b>-1,85</b>                                   | <b>10</b>             | <b>-6,84</b>                                   | <b>9</b>              | <b>5,00</b>                                                        | <b>1,96E-08</b> |
| <i>trnD</i> -GUC            | 34                           | -3,97                                          | 8                     | -6,30                                          | 10                    | 2,33                                                               | 2,50E-06        |
| <i>trnV</i> -GAC            | 197                          | -4,06                                          | 10                    | -5,94                                          | 10                    | 1,87                                                               | 2,73E-07        |
| <i>trnV</i> -UACex2int      | 97                           | -3,24                                          | 9                     | -4,90                                          | 8                     | 1,67                                                               | 3,39E-02        |
| <b>trnG-UCCintex1/ORF69</b> | <b>26</b>                    | <b>-4,36</b>                                   | <b>7</b>              | <b>-6,00</b>                                   | <b>9</b>              | <b>1,64</b>                                                        | <b>7,03E-03</b> |
| rpl23                       | 171                          | -4,29                                          | 10                    | -5,81                                          | 9                     | 1,52                                                               | 1,53E-05        |
| rps8                        | 157                          | -4,04                                          | 6                     | -5,43                                          | 10                    | 1,39                                                               | 9,12E-02        |
| rpoC1/C2                    | 48                           | -4,33                                          | 10                    | -5,69                                          | 9                     | 1,37                                                               | 4,46E-07        |
| rps2B                       | 54                           | -3,39                                          | 7                     | -4,75                                          | 9                     | 1,36                                                               | 1,41E-04        |
| petN3prime                  | 37                           | -3,36                                          | 9                     | -4,71                                          | 10                    | 1,36                                                               | 1,94E-05        |
| orf173-3'                   | 180                          | -4,01                                          | 10                    | -5,30                                          | 10                    | 1,29                                                               | 4,42E-05        |
| rpl16-int                   | 162                          | -4,32                                          | 10                    | -5,56                                          | 6                     | 1,24                                                               | 6,75E-06        |
| rpl2/rpl23                  | 170                          | -4,21                                          | 10                    | -5,44                                          | 10                    | 1,23                                                               | 6,78E-06        |
| psaC/ndhE/ndhG              | 236                          | -2,60                                          | 5                     | -3,82                                          | 9                     | 1,23                                                               | 1,16E-01        |
| rpl14                       | 159                          | -4,25                                          | 9                     | -5,39                                          | 8                     | 1,13                                                               | 3,07E-02        |
| rpl33                       | 127                          | -3,38                                          | 8                     | -4,51                                          | 10                    | 1,12                                                               | 2,42E-04        |
| <b>ORF69</b>                | <b>27</b>                    | <b>-4,17</b>                                   | <b>6</b>              | <b>-5,26</b>                                   | <b>9</b>              | <b>1,09</b>                                                        | <b>3,31E-02</b> |
| rrn16-3prime                | 200                          | -2,44                                          | 10                    | -3,53                                          | 8                     | 1,09                                                               | 4,25E-02        |
| rps3                        | 163                          | -4,34                                          | 9                     | -5,32                                          | 8                     | 0,98                                                               | 2,66E-02        |
| ycf9                        | 20                           | -3,94                                          | 9                     | -4,89                                          | 10                    | 0,95                                                               | 3,85E-03        |
| trnT-GGU/trnE-UCC5'         | 30                           | -4,34                                          | 9                     | -5,19                                          | 9                     | 0,85                                                               | 1,06E-03        |
| atpF1                       | 61                           | -3,83                                          | 10                    | -4,64                                          | 9                     | 0,81                                                               | 3,04E-03        |
| rpl20/rps12int15'           | 130                          | -3,61                                          | 10                    | -4,42                                          | 9                     | 0,81                                                               | 1,11E-02        |
| trnL-UAG                    | 227                          | -3,34                                          | 9                     | -3,78                                          | 9                     | 0,44                                                               | 5,85E-01        |
| ycf3ex1/trnS5'              | 81                           | -4,17                                          | 10                    | -4,52                                          | 8                     | 0,35                                                               | 2,13E-01        |
| trnI-CAU                    | 173                          | -4,14                                          | 9                     | -4,39                                          | 8                     | 0,24                                                               | 1,71E-01        |
| orf139                      | 176                          | -3,44                                          | 8                     | -3,53                                          | 10                    | 0,09                                                               | 8,95E-01        |

Elements ranking in the top 10% for median normalized enrichment ratio (E) from wild-type stroma are ordered according to the magnitude of their relative enrichment in PPR5 versus OEC immunoprecipitations (E<sub>PPR5</sub> - E<sub>OEC</sub>). Fragments that map within or adjacent to the *trnG*-UCC locus are in boldface

<sup>a</sup> Fragments on the array are numbered according to chromosomal position. The nucleotide residues on each fragment are described in Array Express (accession number A-MEXP-164) and in Supplemental Table 1 from (5).

<sup>b</sup> E = median (log<sub>2</sub>F635/F532) normalized across two replicate experiments with PPR5 antibodies and two control experiments (one with antibodies against OEC23 and one with antibodies against OEC16).

Replicate experiments constitute a total of *n* replicate spots with signal above background. Fragments for which at least three spots per array did not meet our background cutoff in the supernatant (F532) channel were not considered reliable and were not used to generate this table.

<sup>c</sup> P values were calculated with a t test (two-tailed, unequal variance) and represent the probability that there is no difference in enrichment from PPR5 and OEC immunoprecipitations.

**Supplementary Information, Table S2: Oligonucleotides and probes used in this study**

| Fig.           | Detection of                    | Probes / Primers <sup>§</sup>                                                                            |                                     | Homologous to | Pos 1 <sup>#</sup> | Pos 2 <sup>#</sup> |
|----------------|---------------------------------|----------------------------------------------------------------------------------------------------------|-------------------------------------|---------------|--------------------|--------------------|
| Fig. 1C        | <i>ppr5</i>                     | AGCTGGTGCGCTCGCTGCT (ppr5-cDNAF3)                                                                        | GGAGTAGATGCCGTTGTCAGC (ppr5-cDNAR3) | nucleus       | /                  | /                  |
|                | <i>actin</i>                    | GCCACTGATCCAGACACTGT                                                                                     | ATTCAGGTGATGGTGTGAGC                | nucleus       | /                  | /                  |
| Fig. 2B        | <i>rrn16</i>                    | maize cp DNA fragment in clone prrn16-1, a Bluescript SKII- derivative; primers M13for and M13rev        |                                     | plastid       | 95236              | 95553              |
|                | <i>rrn23</i>                    | AAGGCCCTTAATGACCGCT                                                                                      | CGGCTCGAGGCATTTTCTCT                | plastid       | 100098             | 100599             |
| Fig. 3B        | <i>trnG</i> -UCC probe A        | GCCTTAAGTATATCATTTCA                                                                                     | GGGCTATCTAAATCCTAA                  | plastid       | 13942              | 14167              |
|                | <i>trnG</i> -UCC probe B        | TCCGCTCTGTAGGGCCGAAAACCT                                                                                 | GGTTTTGAATTAGAGA                    | plastid       | 13141              | 13341              |
|                | <i>trnG</i> -UCC probe C        | CTTCGTCCCTAATTC                                                                                          | GCGGGTATAGTTTAGTGG                  | plastid       | 13505              | 14013              |
|                | <i>trnG</i> -UCC probe D        | AGCGGGTAGCGGGAATC                                                                                        | GGGAACGAAGTAAG                      | plastid       | 13245              | 13514              |
|                | <i>rpl23</i>                    | CCGTATTATTAAGTATTCTC                                                                                     | TACTGGAACCTCAGAGCATAG               | plastid       | 84411              | 84750              |
|                | <i>trnV</i> -UACexint           | ATTATGAAACAGAATATCTCTG                                                                                   | TCTTGCAGCGGAACGATAGAGA              | plastid       | 52711              | 53491              |
|                | <i>rpl16</i> intron             | AATGAAATGAGAAGCGTGCGA                                                                                    | CAACCTATTGCTTCGTATTGTCTG            | plastid       | 80002              | 80888              |
| Fig. 4D        | <i>trnG</i> -UCC intron         | TATCCAAAGACTAATTGAATTTGC                                                                                 | GAATGAAATTAGGGAACGAAGTA             | plastid       | 13503              | 13828              |
|                | <i>trnG</i> -UCC exon 2         | CATCGTTAGCTTGGAAGGCTAGG                                                                                  |                                     | plastid       | 13269              | 13291              |
|                | <i>trnV</i> -GAC                | CTTCCACCACGTCAAGGTGACACTCTACCGC                                                                          |                                     | plastid       | 94903              | 94873              |
|                | <i>trnD</i> -GUC                | CGAACCCGCAGCTTCCGCCTTGACAGGGC                                                                            |                                     | plastid       | 17110              | 17082              |
| Fig. 5         | <i>trnG</i> -UCC intron 5'      | TATCCAAAGACTAATTGAATTTGC                                                                                 | GAATGAAATTAGGGAACGAAGTA             | plastid       | 13503              | 13828              |
|                | <i>trnG</i> -UCC exon 2         | CATCGTTAGCTTGGAAGGCTAGG                                                                                  |                                     | plastid       | 13269              | 13291              |
|                | <i>trnG</i> -UCC exon 1         | CACACTTTACCAAACCTATACCCGCTAC                                                                             |                                     | plastid       | 13986              | 14016              |
|                | <i>trnG</i> -UCC intron 3'      | GTTATAGTCGACGTTGGTTGATTATTTTGCAGCTCTTAATTCAAAACCGAA<br>CATGAAATTTGATTTTCAATTCGGCTCCTTTATGGATATTCTCACCACT |                                     | plastid       | 13293              | 13392              |
| Fig. 6         | <i>cox1</i>                     | TTCATCTTCGGTGCCATTGC                                                                                     | CCTGCCAGTACCGGAAGTGA                | mitoch.       | 354925             | 355484             |
|                | <i>actin</i>                    | GCCACTGATCCAGACACTGT                                                                                     | ATTCAGGTGATGGTGTGAGC                | nucleus       | /                  | /                  |
|                | <i>trnV</i> -UAC                | AGGGCTATAGCTCAGTTCGGT                                                                                    | TAGGGCTATACGGAT                     | plastid       | 53158              | 53834              |
|                | <i>trnG</i> -UCC                | GCGGGTATAGTTTAGTGGTAAA                                                                                   | ATCGAACCCGCATCGTTAGC                | plastid       | 13259              | 14013              |
|                | pDrive                          | acc. no. DQ996013                                                                                        |                                     | vector        | /                  | /                  |
|                | <i>trnG</i> -UCC exon 2         | CATCGTTAGCTTGGAAGGCTAGG                                                                                  |                                     | plastid       | 13269              | 13291              |
|                | <i>trnG</i> -UCC gene unspliced | ATCGAACCCGCATCGTTAGC                                                                                     | GCGGGTATAGTTTAGTGGTAAA              | plastid       | 13259              | 14013              |
| Suppl. Fig. S2 | <i>rps2</i>                     | GCCCCCTTACATCTCGGCAAA                                                                                    | CATAATATATATCAATACCCTC              | plastid       | 31951              | 32697              |
|                | <i>rpl33</i>                    | GTTTCATGGCCAAGGGCAAAG                                                                                    | TGATCCAGAACCAGAAGAAG                | plastid       | 66994              | 67470              |
| Suppl. Fig. S3 | <i>rpl16</i> intron             | AATGAAATGAGAAGCGTGCGA                                                                                    | CAACCTATTGCTTCGTATTGTCTG            | plastid       | 80002              | 80888              |
|                | <i>rpl16</i> exon               | TTCCAGAAAGAAAAACAGGGG                                                                                    | AATCCTGCCGAGGCAATCAT                | plastid       | 79466              | 79871              |
|                | <i>rpl33</i>                    | GTTTCATGGCCAAGGGCAAAG                                                                                    | TGATCCAGAACCAGAAGAAG                | plastid       | 66994              | 67470              |
|                | <i>trnD</i> -GUC                | CGAACCCGCAGCTTCCGCCTTGACAGGGC                                                                            |                                     | plastid       | 17110              | 17082              |
|                | <i>rpl14</i>                    | TAAATTTAGGATTTTAAAGC                                                                                     | TGAAGATAAAAAACCCCTGG                | plastid       | 78959              | 79500              |

# if two primers are given per row, Pos 1 denotes starting position of primer one relative to position 1 on the plastid chromosome of maize (3). If only one primer or a clone insert is given, pos1 and pos2 denote the start and end-point of the primer /clone insert relative to position 1 on the plastid chromosome of maize. For *cox1* primers, the start position of the primer relative to the mitochondrial chromosome of maize is indicated (2).

<sup>§</sup> all primers are given in 5'-to-3' direction

## Supplementary References

1. Altschul, S. F., T. L. Madden, A. A. Schaffer, J. Zhang, Z. Zhang, W. Miller, and D. J. Lipman. 1997. Gapped BLAST and PSI-BLAST: a new generation of protein database search programs. *Nucleic Acids Res* **25**:3389-3402.
2. Clifton, S. W., P. Minx, C. M. Fauron, M. Gibson, J. O. Allen, H. Sun, M. Thompson, W. B. Barbazuk, S. Kanuganti, C. Tayloe, L. Meyer, R. K. Wilson, and K. J. Newton. 2004. Sequence and comparative analysis of the maize NB mitochondrial genome. *Plant Physiol* **136**:3486-3503.
3. Maier, R. M., K. Neckermann, G. L. Igloi, and H. Kossel. 1995. Complete sequence of the maize chloroplast genome: gene content, hotspots of divergence and fine tuning of genetic information by transcript editing. *J Mol Biol* **251**:614-28.
4. Saitou, N., and M. Nei. 1987. The neighbor-joining method: a new method for reconstructing phylogenetic trees. *Mol Biol Evol* **4**:406-425.
5. Schmitz-Linneweber, C., R. Williams-Carrier, and A. Barkan. 2005. RNA immunoprecipitation and microarray analysis show a chloroplast Pentatricopeptide repeat protein to be associated with the 5' region of mRNAs whose translation it activates. *Plant Cell* **17**:2791-2804.
6. Thompson, J., D. Higgins, and T. Gibson. 1994. Clustal W: Improving the sensitivity of progressive multiple sequence alignment through sequence weighting, position-specific gap penalties and weight matrix choice. *Nucl Acids Res* **22**:4673-4680.

## Supplementary Figure Legends

### Supplementary Information, Figure S1: Phylogenetic analysis of PPR5 homologs.

A) Neighbor joining distance tree of rice and Arabidopsis proteins that were found as best hits in BLAST (1) searches with the Arabidopsis PPR5 sequence as query. Arabidopsis protein phosphatase 5, a tetratricopeptide repeat protein was used as outgroup. Alignments were performed using the ClustalW algorithm (6) and the tree was constructed using the neighbour-joining algorithm (4). Bootstrap values were from 100 repetitions.

B) Alignment of PPR5 orthologs in maize (Zm), Rice (Os), and Arabidopsis (At). TargetP (Emanuelsson et al., 2000) and Predotar (Small et al., 2004) algorithms both predict that all three proteins are targeted to the chloroplast. The insertion site of the *Mu1* element in *ppr5-1* mutants is indicated by an arrowhead. PPR domains were identified at <http://toolkit.tuebingen.mpg.de/tprpred> and are indicated above the sequences by brackets. AtPPR5 corresponds to AGI locus At4g39620; OsPPR5 corresponds to TIGR locus Os02g51480. ZmPPR5 corresponds to GenBank accession EU037901.

### Supplementary Information, Figure S2: Slot-blot analysis of RNAs that were detected in RIP-chip experiments as potential minor partners of PPR5.

Blots shown here are the same as those shown in Figure 3B after stripping of the previous probe and reprobing with the probes indicated. One-sixth of the RNA recovered from each immunoprecipitation pellet (P) and one-twelfth of the RNA recovered from each supernatant (S) was applied to replicate slot blots.

**Supplementary Information, Figure S3:** RNA gel blot hybridisation of RNAs that were detected in RIP-chip experiments as potential minor partners of PPR5 or that are positioned adjacent to such minor partners on the plastid chromosome.

RNAs from seedlings were size-fractionated on agarose gels, transferred to nylon-membranes and hybridized with the probes indicated below. For *rpl16*, a large precursor RNA accumulating in WT is reduced in mutants (upper asterisk). A smaller intron-containing RNA increased in *ppr5* mutants (lower asterisk). The other hybridizations did not lead to the identification of major qualitative differences between wild-type and *ppr5* mutant RNA samples.

A

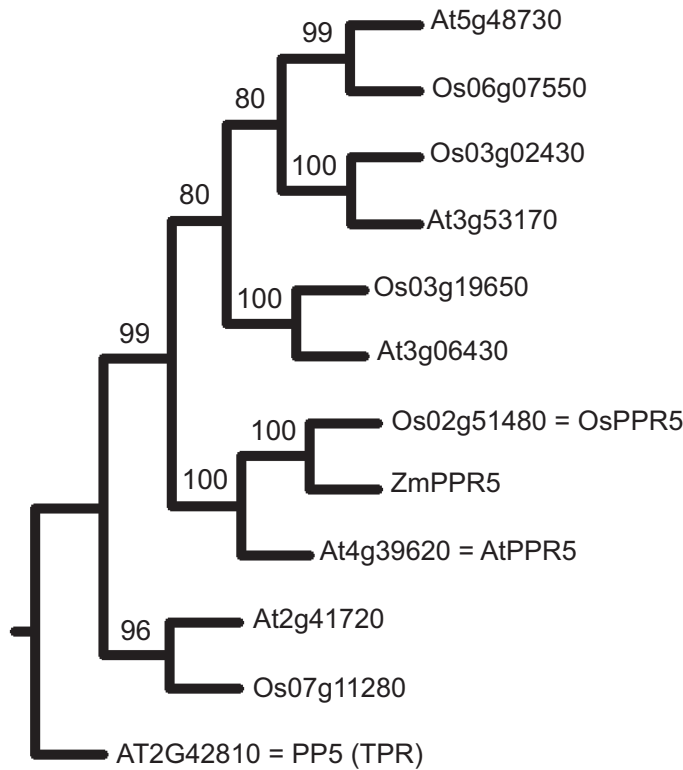

B

|         |                                                                                     |     |
|---------|-------------------------------------------------------------------------------------|-----|
| Zm PPR5 | ---MLACPS-----TSSEWQQRQPPSPCPGGGGGATRHVALAARSKRRGAGPAAAEGVDEAAAEEAELVRSLLRRTA       | 69  |
| Os PPR5 | ---MLAYPT-----TSSEWPERRHG--AAAAPAARRHMAAAARGKRRGAGAAAEGADEAA-EAADLVRFFLRRTS         | 66  |
| At PPR5 | MDYLLTSPSSLRFSDFISSIPEKETDHWLRF SVNLGDARRSTRTRITCGAISRRLAE-RESAERENRVLVRSLSMSRIS    | 79  |
| Zm PPR5 | GGKERLIVAVLDRHVRVVRTEHCFLLEELGRRDAWILQCLD VFRWMQQRWYVADNGIYSKLISVMGRKGQIRMAMWLF SQ  | 149 |
| Os PPR5 | GGKERLIVAVLDRHVKVVVRTEHCFLLEELGRRDGLWLCLEVFRWMQQRWYVADNGIYSKLISVMGRKGQIRMAMWLF SQ   | 146 |
| At PPR5 | D-REELVKILLDKYKVVRCDFHCFLLFEELGKSDKWLQCLEVFRWMQQRWYLPDNGVYSKLISVMGKKGQIRMAMWLF SE   | 158 |
| Zm PPR5 | MRNSGCKPDTSVYNSLIGAHLSRDKKALAKALGYFEKMKCTERCQPIITVYTNILLRAFAQAGDTKQVDMLFKDLDES V    | 229 |
| Os PPR5 | MRNSGCREPDTSVYNSLIGLHLHSRDKSKALAKALGYFEKMKLIDRCQPNITVYTNILLRAFAQAGDTKQLDILFKDLDES P | 226 |
| At PPR5 | MNSGCREPDASVYNALLTAHLHTRDKAKALEKVRGYLDKMKCTERCQPNVITYTNILLRAFAQSGKVDQVNALFKDLDMSP   | 238 |
| Zm PPR5 | VSPDVYTYNGVMDAYGKNGMIKEMESVLVRMKSITQCRPDVITFNILIDSYGRKQIFDKMEQVFKSLLRSKERPTHPTFNS   | 309 |
| Os PPR5 | VSPDITYTYNGVMDAYGKNGMITEMESVLVRMKSNTQCRPDVITFNILIDSYGRKQAFDKMEQVFKSLLRSKEKPTHPTFNS  | 306 |
| At PPR5 | VSPDVYTYNGVMDAYGKNGMIKEMEAVLIRMR SNECKPDIITFNVLIDSYGKQEFKMEQTFKSLMRSKEKPTLPTFNS     | 318 |
| Zm PPR5 | MITNYGKARLREKAESVVEKMEETGFKPNYVTQECLIMYAH CDCVSKARQVFDELVTSQTKVHLSLNSML EAYCMNGL    | 389 |
| Os PPR5 | MITNYGKARLREKAECVLDKMEEMGFKPNYVTQECLIMYAY CDCVSRARQIFDELVSSQNNVHLS SVNAML DAYCMNGL  | 386 |
| At PPR5 | MITNYGKARLREKAESVVEKMEETGFKPNYVTQECLIMYAH CDCVSKARQVFDELVTSQTKVHLSLNSML EAYCMNGL    | 398 |
| Zm PPR5 | HTEADRLLDLALQCCVVENGSTYKLLYKAYTKANDKLLVQKLLKRMNKQGI VPNKKFFLDALAEFGTSDRKPRTSPGINS   | 469 |
| Os PPR5 | PEADQLLDL SVIKKGAVPSASTYKLLYKAYTKANDKLLIQKLLKRMNSQGI VPNKKFFLDALAEFGTNDKKPRTVPSKNS  | 466 |
| At PPR5 | YTEADKLEFHNASAFRVHEDASTYKLLYKAYTKADMEQVQILMKMEKDGIVPNKRFFLEALEVFGS--RLPGSGSENK      | 476 |
| Zm PPR5 | ASKPSTDSAGDSETATSDKPEVSVWHVAAT                                                      | 499 |
| Os PPR5 | ASKPDVESANNSTGDTSSKPNLSVWQVAA-                                                      | 495 |
| At PPR5 | STRSSRSRSDSPKGRGGNQLTEFQDKDVTN-                                                     | 505 |

Supplemental Information, Figure S2, Beick et al.

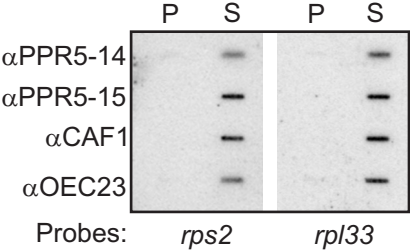

Supplemental Information, Figure S3, Beick et al.

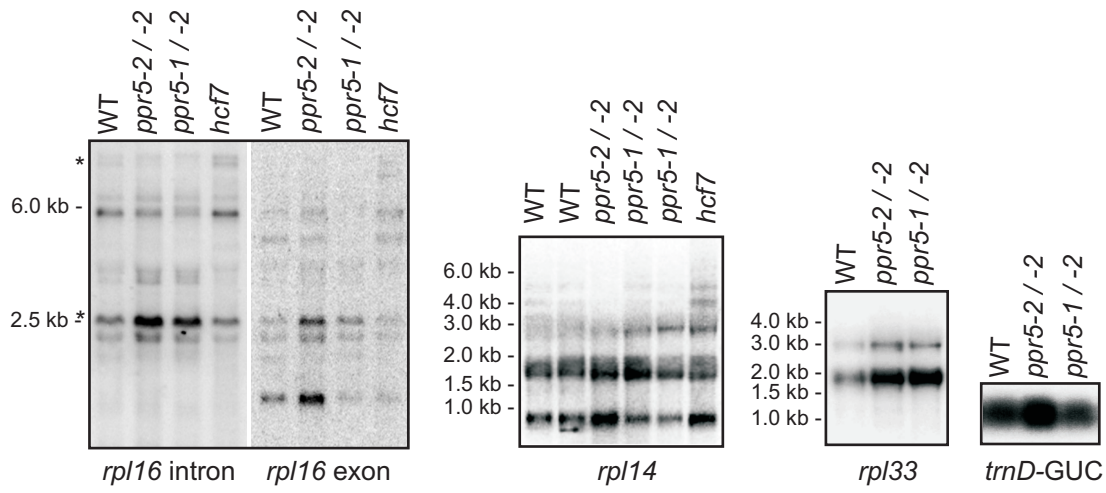

Supplement: supp_28_17_5337_v2_1.pdf [file supp_28_17_5337_v2_1.pdf]
